# Supplementary material for: Blue light-emitting and hole-transporting materials based on 9,9-bis(4-diphenylaminophenyl)fluorenes for efficient electroluminescent devices
Source: Royal Society of Chemistry journal article supplement (doi:10.1039/c2jm15480c), 2012-01-01

## Supporting Information

### **Blue Emitting and Hole-Transporting Materials Based on Bis(4-diphenylaminophenyl)fluorenes for Efficient Electroluminescent Devices**

*A-monrat Thangthong, Narid Prachumrak, Ruangchai Tarsang, Tinnagon Keawin, Siriporn Jungsuttiwong, Taweesak Sudyoadsuk and Vinich Promarak\**

Center for Organic Electronic and Alternative Energy, Department of Chemistry and Center for Innovation in Chemistry, Faculty of Science, Ubon Ratchathani University, Warinchumrap, Ubon Ratchathani, 34190 Thailand.

E-mail: [pvinich@ubu.ac.th](mailto:pvinich@ubu.ac.th) ; [pvinich@gmail.com](mailto:pvinich@gmail.com)

#### **Synthesis of 2,7-Dibromo-9,9-bis(4-diphenylaminophenyl)fluorene (2)**

A mixture of 2,7-dibromofluorenone (2.57 g, 6.79 mmol), triphenylamine (16.67 g, 67.99 mmol), and methanesulfonic acid (0.45 ml) was heated at 190 °C for 6 h. The cooled mixture was poured into water. The greenish precipitate was filtered, washed with water and dried to afford crude compound **3**. Purification by column chromatography using silica gel eluting with a mixture of CH<sub>2</sub>Cl<sub>2</sub> and hexane followed by recrystallized from methanol/CH<sub>2</sub>Cl<sub>2</sub> afforded light white solids (3.72 g, 61%); <sup>1</sup>H NMR (300.13 MHz, CDCl<sub>3</sub>) δ 6.99 ppm (4H, d, *J* = 9.01 Hz), 7.00 (8H, t, *J* = 9.01 Hz), 7.09 (8H, d, *J* = 9.01 Hz), 7.26 (8H, t, *J* = 9.01 Hz), 7.55 (4H, t, *J* = 9.01 Hz), 7.58 (2H, d, *J* = 9.01 Hz); <sup>13</sup>C NMR (75 MHz, CDCl<sub>3</sub>) δ 64.65 ppm, 121.55, 121.76, 122.77, 123.06, 124.5, 124.68, 128.69, 129.27, 129.38, 130.82, 137.66, 137.98, 146.74, 147.52 and 153.47; HRMS *m/z* calcd for C<sub>49</sub>H<sub>34</sub>Br<sub>2</sub>N<sub>2</sub>, 808.1089; found, 809.1169 [MH<sup>+</sup>].

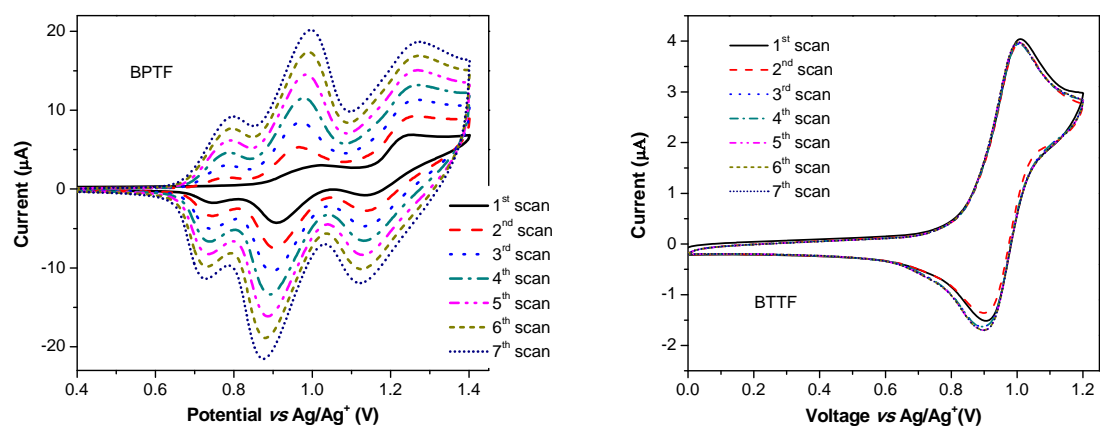

**Fig. S1** Multiple CV scan curves of **BPTF** and **BTTF** measured in  $\text{CH}_2\text{Cl}_2$  at a scan rate of  $50 \text{ mV s}^{-1}$ .

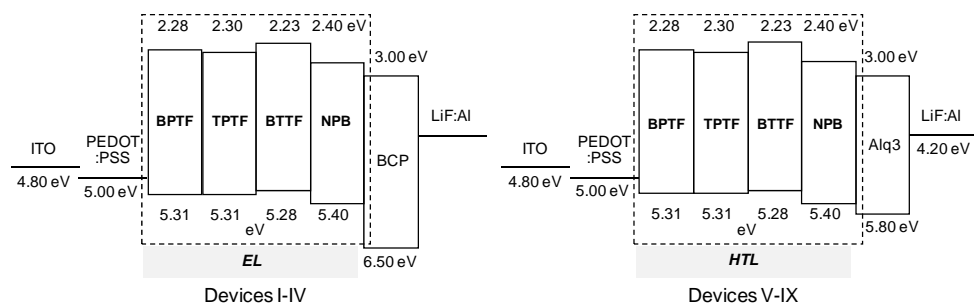

**Fig. S2** Band energy diagram of the OLED devices.

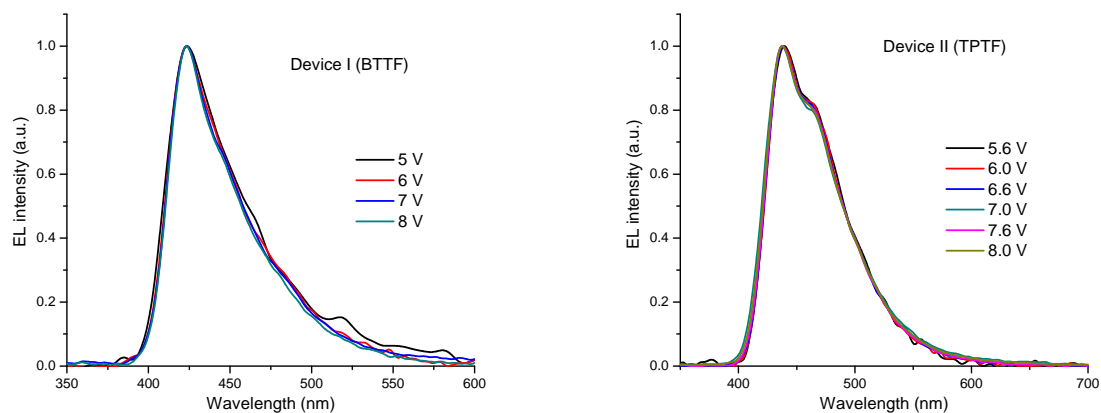

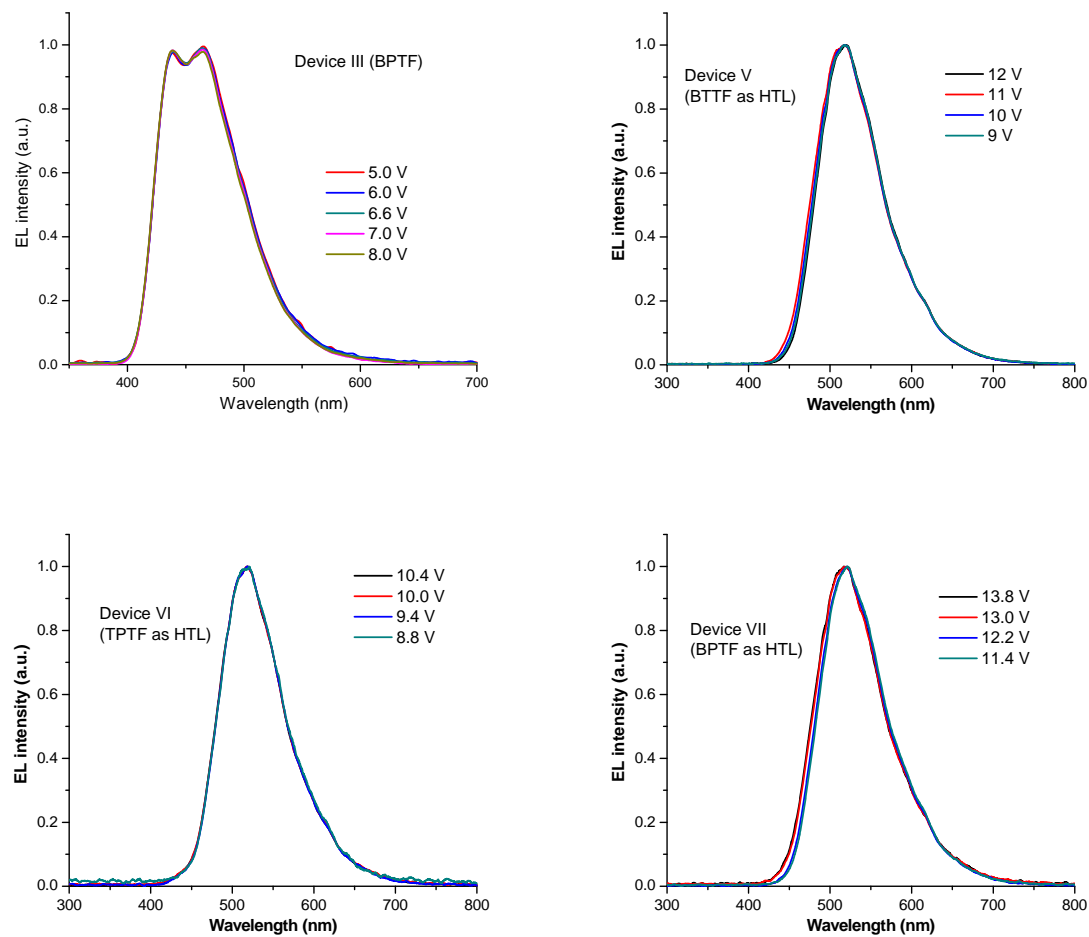

**Fig. S3** Normalized EL spectra of OLED devices under different applied voltages.

**Fig. S4**  $^1\text{H}$ -NMR,  $^{13}\text{C}$ -NMR and Mass spectra of **BTTF**, **TPTF**, **3** and **BPTF**.

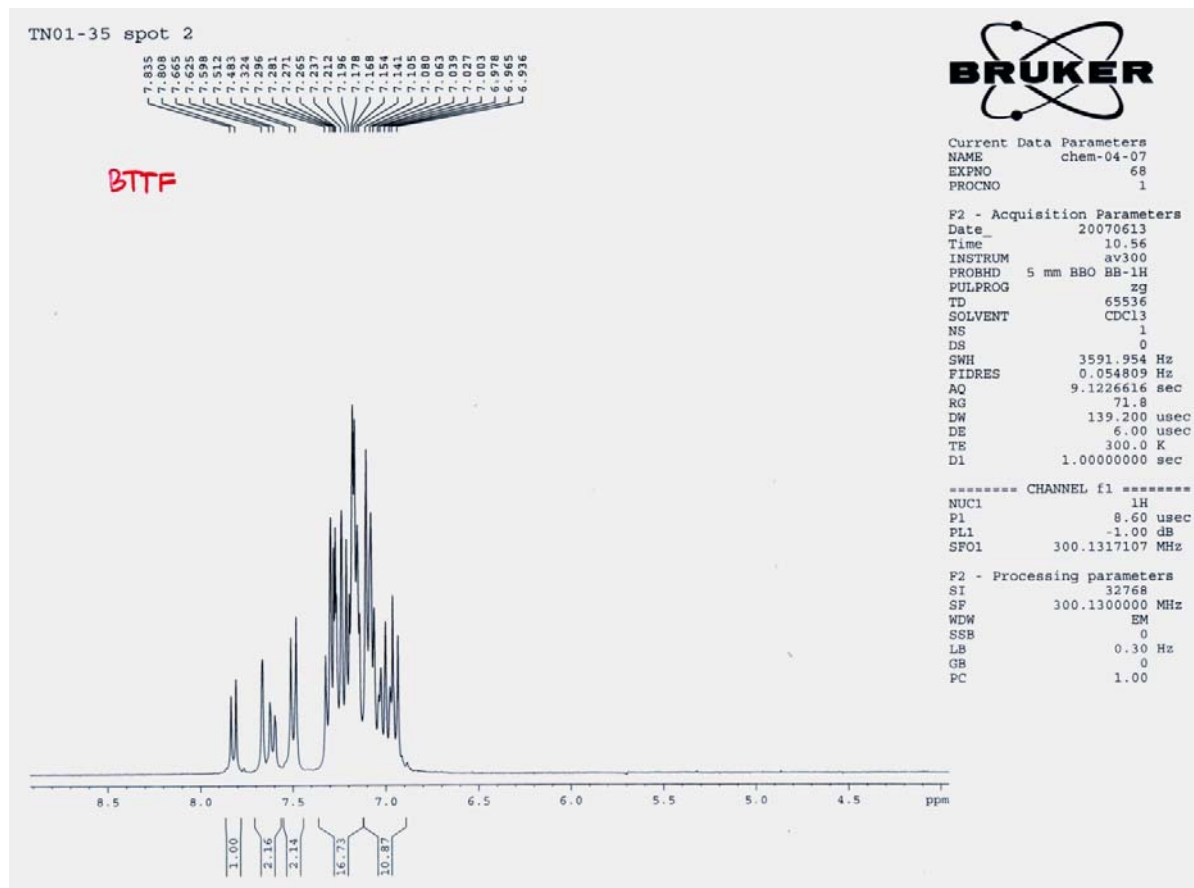

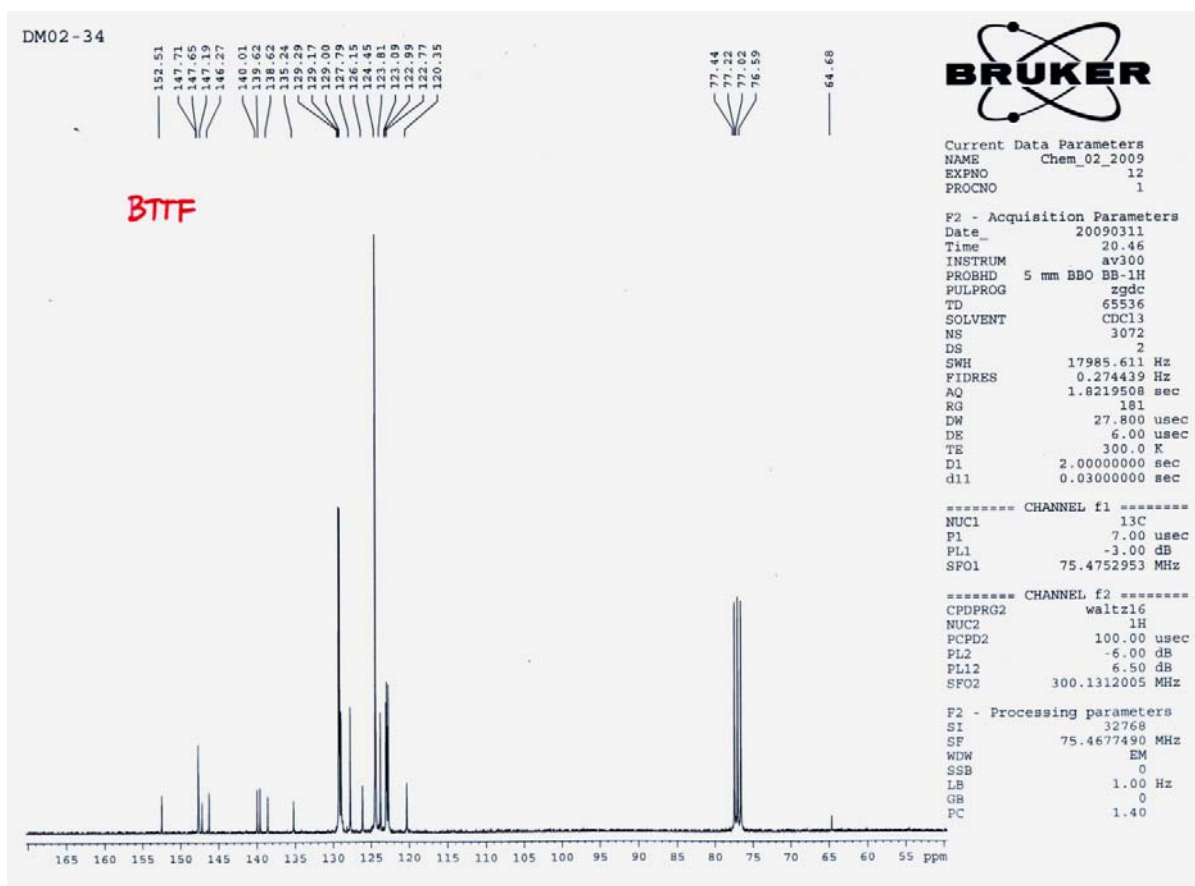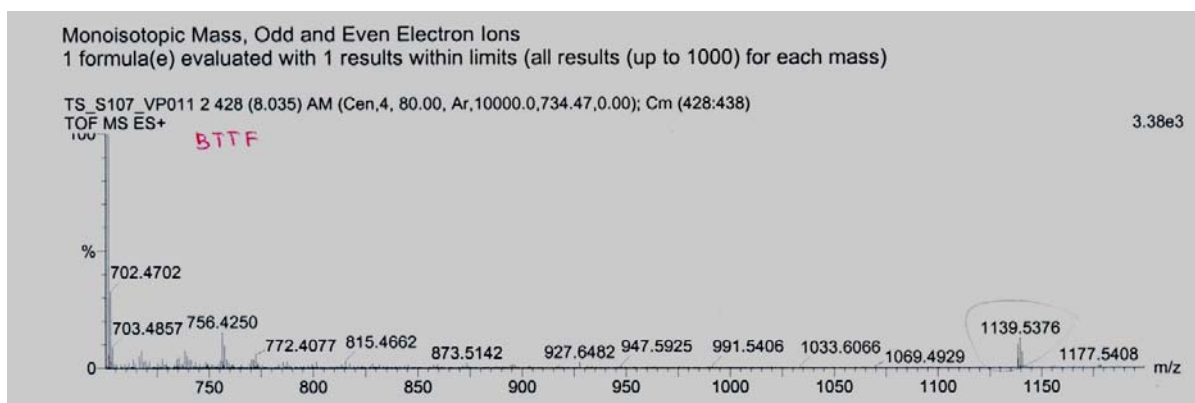

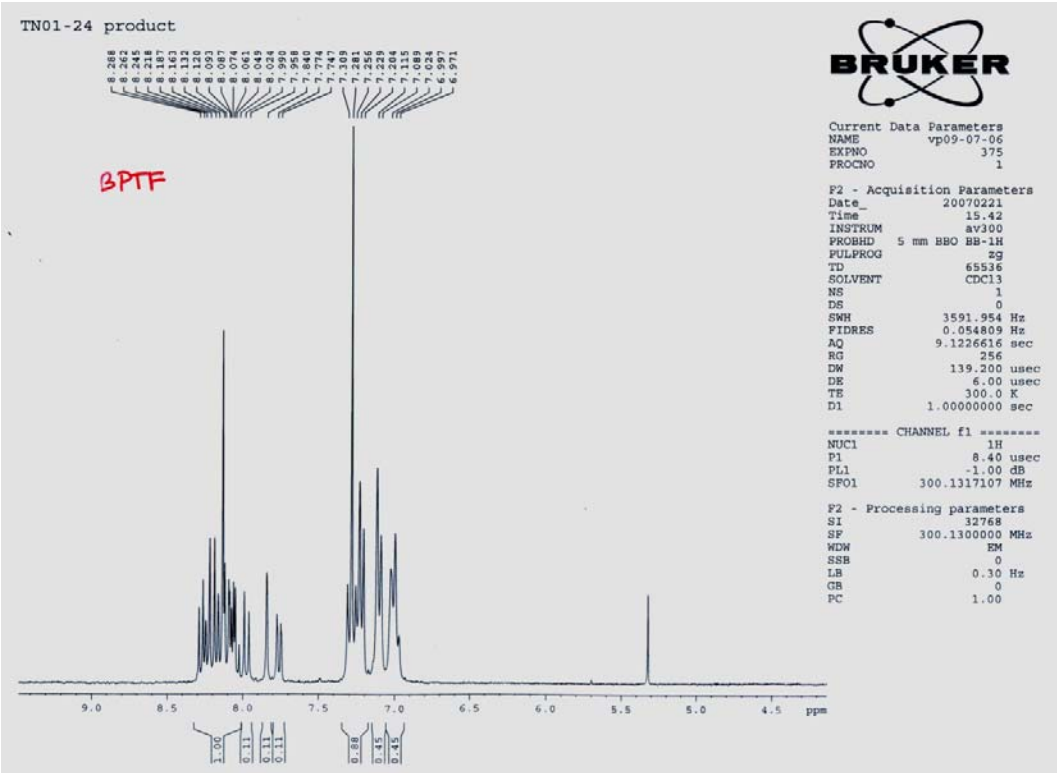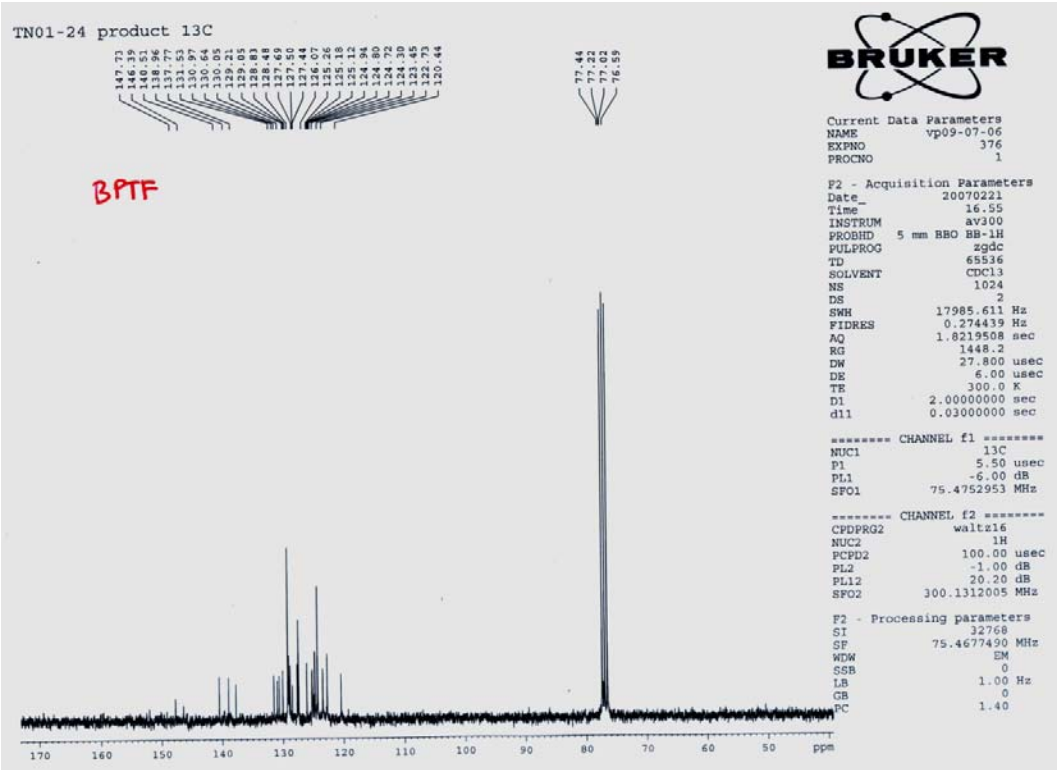

Analysis Info

Analysis Name UUV1904005.d  
Method TUNEMIXall17NOV08.m  
Sample Name VP015  
VP015

Acquisition Date 4/19/2010 3:30:55 PM  
Operator Administrator  
Instrument micrOTOF 72

Acquisition Parameter

Source Type APCI  
Scan Range n/a  
Scan Begin 50 m/z  
Scan End 3000 m/z

Ion Polarity Positive  
Capillary Exit 200.0 V  
Hexapole RF 200.0 V  
Skimmer 1 70.0 V  
Hexapole 1 23.0 V

Set Corrector Fill 47 V  
Set Pulsar Pull 394 V  
Set Pulsar Push 394 V  
Set Reflector 1300 V  
Set Flight Tube 9000 V  
Set Detector TOF 2300 V

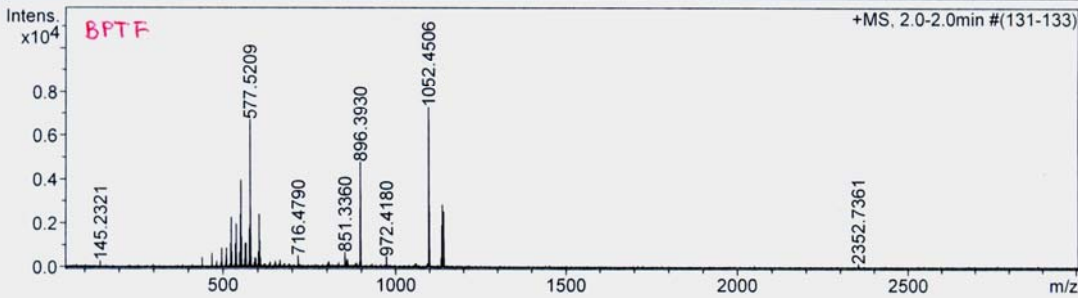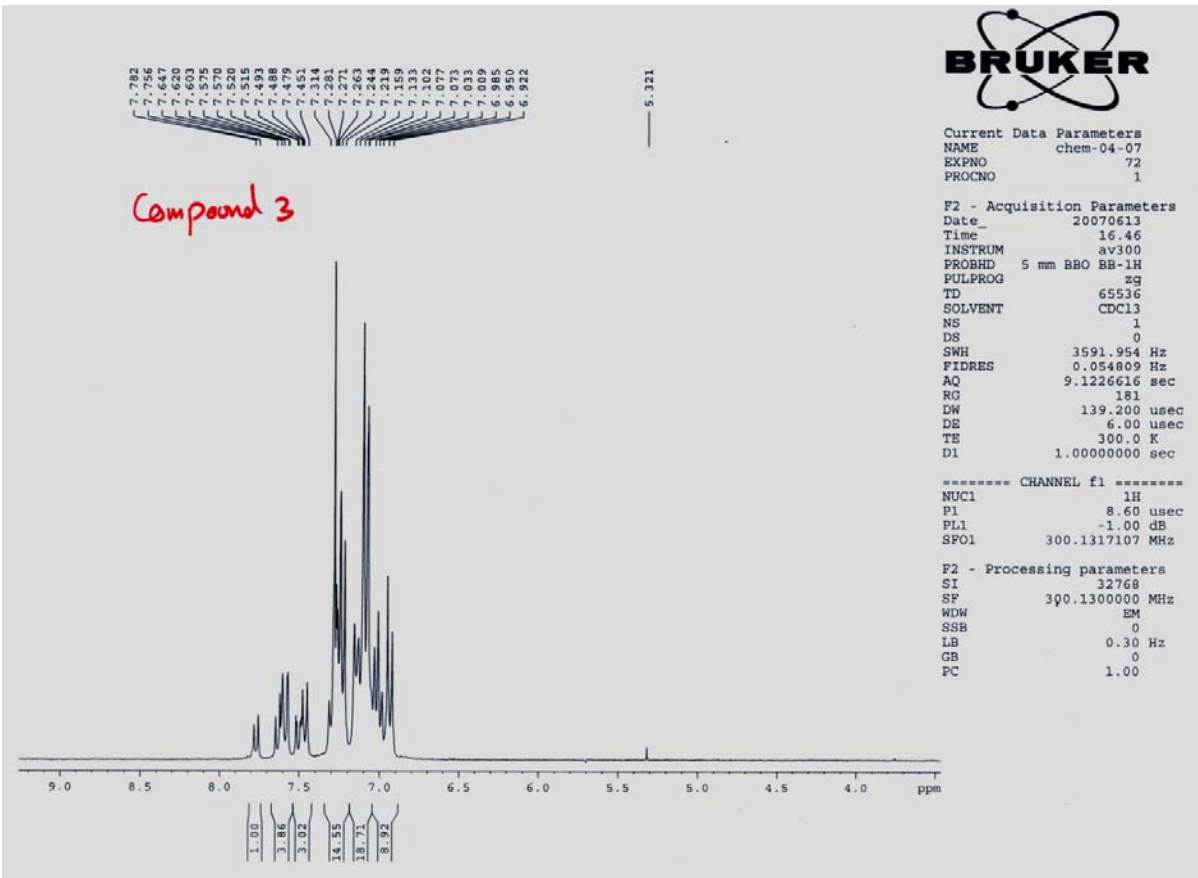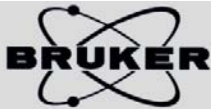

Current Data Parameters  
NAME chem-04-07  
EXPNO 72  
PROCNO 1

F2 - Acquisition Parameters  
Date\_ 20070613  
Time 16.46  
INSTRUM av300  
PROBHD 5 mm BBO BB-1H  
PULPROG zg  
TD 65536  
SOLVENT CDCl3  
NS 1  
DS 0  
SWH 3591.954 Hz  
FIDRES 0.054809 Hz  
AQ 9.1226616 sec  
RG 181  
DW 139.200 usec  
DE 6.00 usec  
TE 300.0 K  
D1 1.00000000 sec

===== CHANNEL f1 =====  
NUC1 1H  
P1 8.60 usec  
PL1 -1.00 dB  
SFO1 300.1317107 MHz

F2 - Processing parameters  
SI 32768  
SF 300.1300000 MHz  
WDW EM  
SSB 0  
LB 0.30 Hz  
GB 0  
PC 1.00

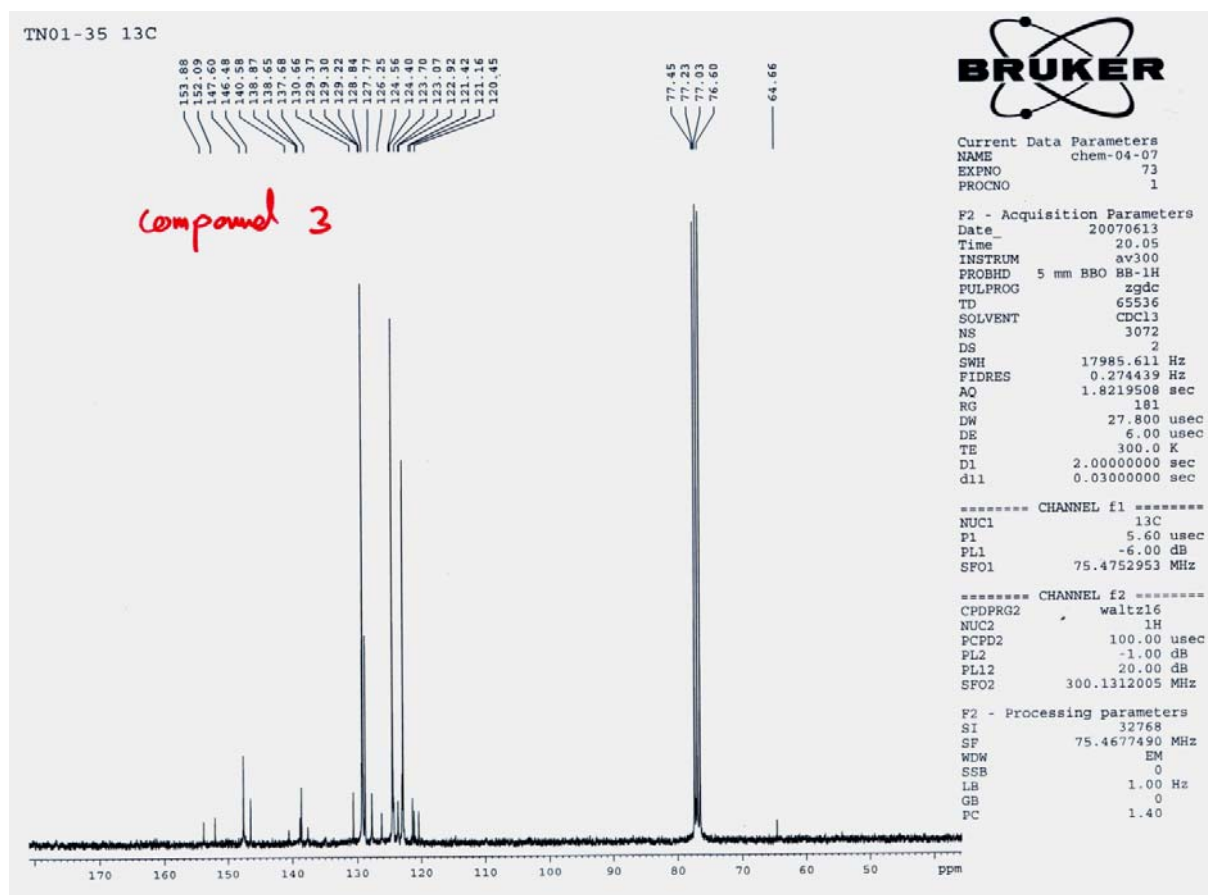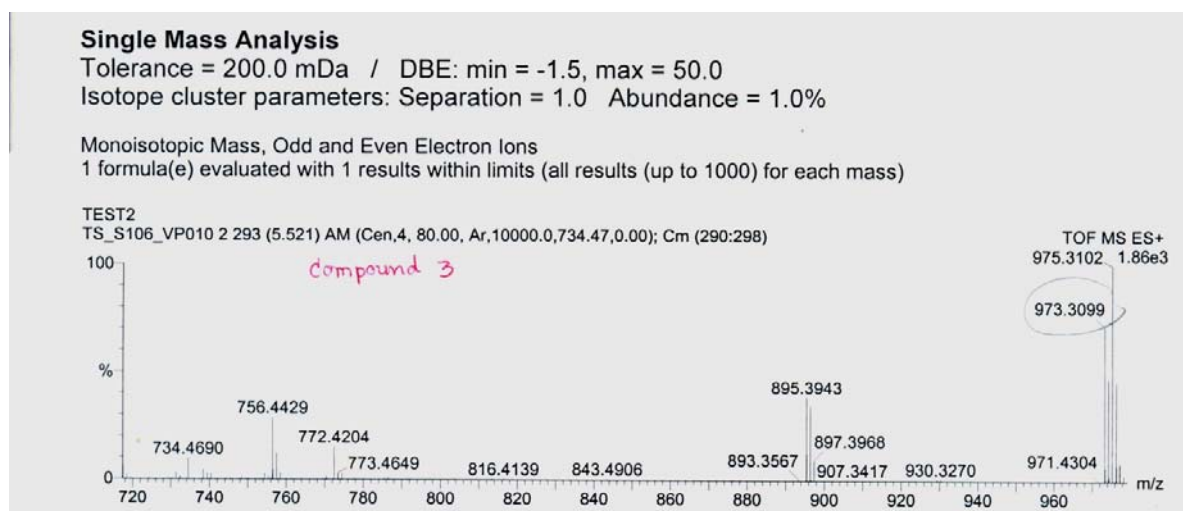

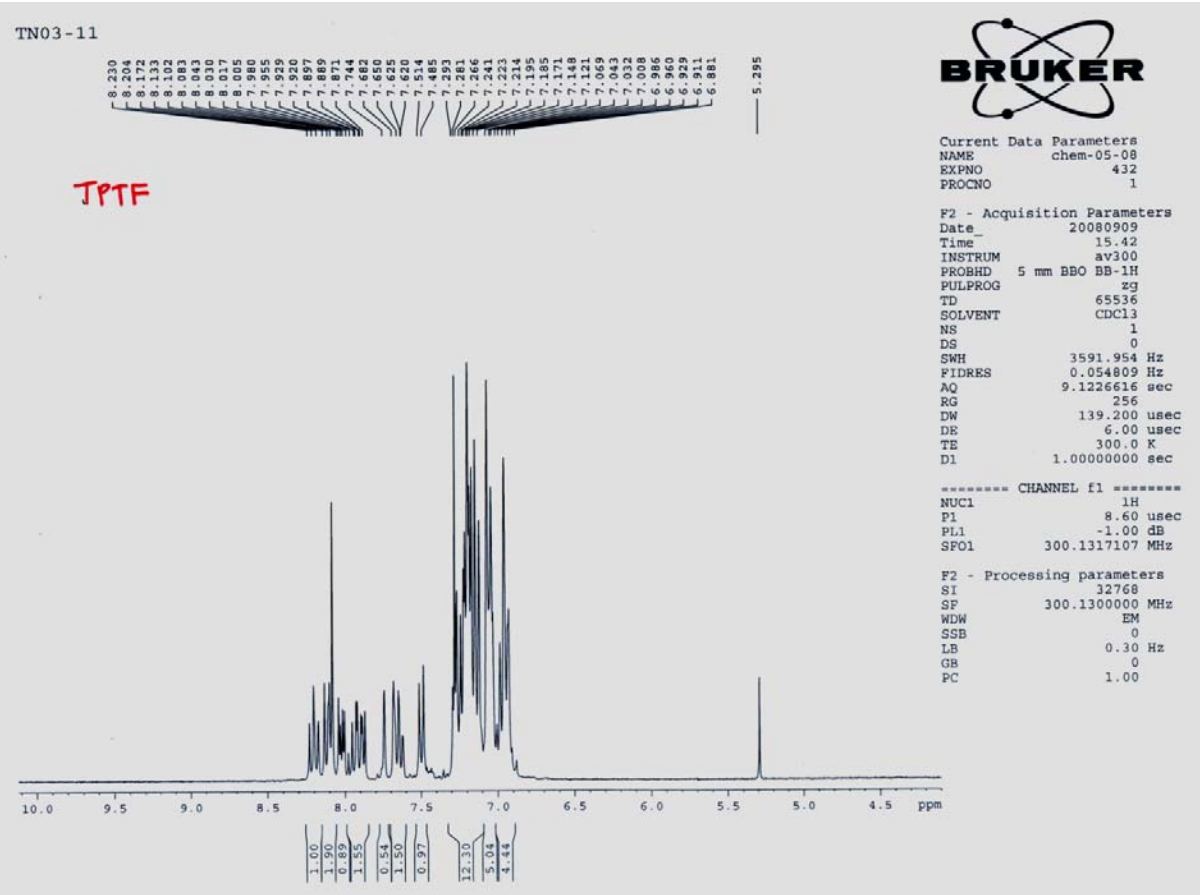

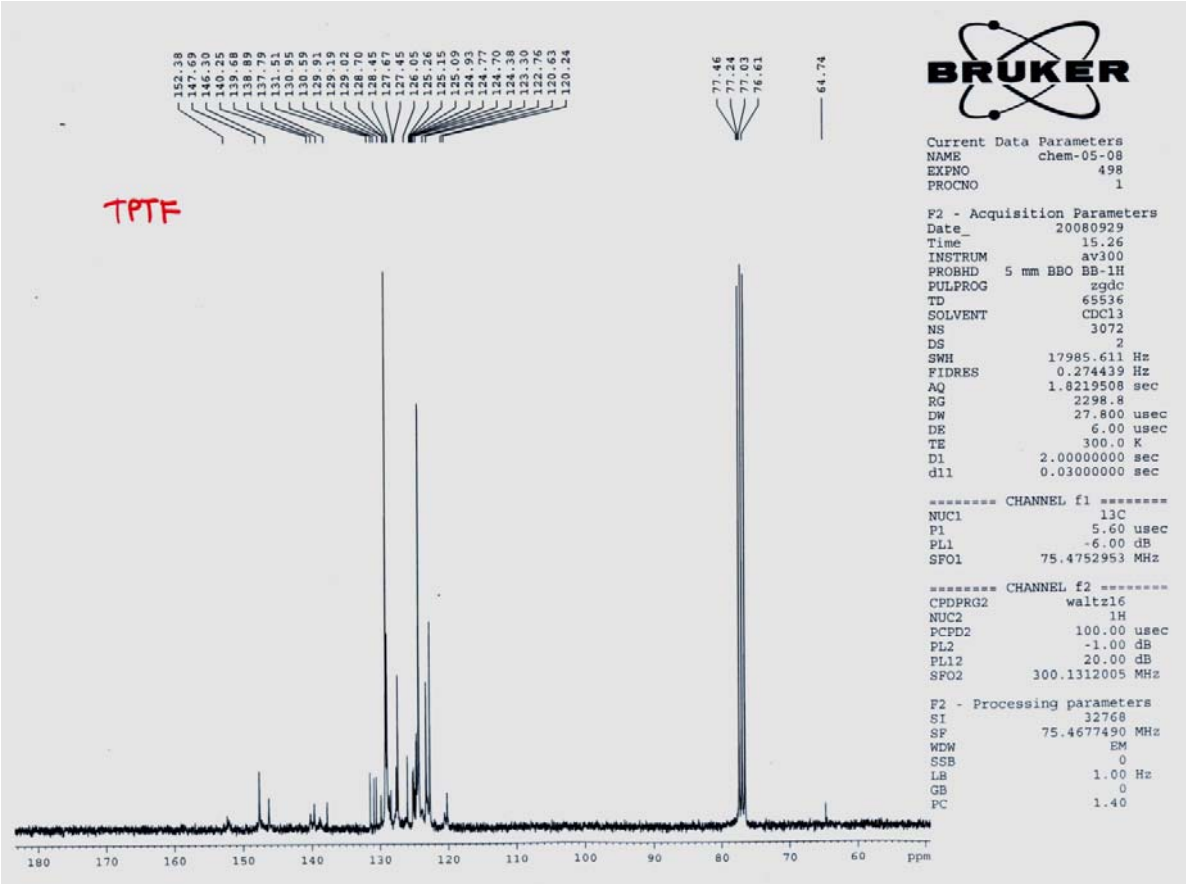

**Analysis Info**

Analysis Name UUV1904004.d  
Method TUNEMIXall17NOV08.m  
Sample Name VP012  
VP012

Acquisition Date 4/19/2010 3:22:56 PM  
Operator Administrator  
Instrument micrOTOF 72

**Acquisition Parameter**

|             |          |                |          |                    |        |
|-------------|----------|----------------|----------|--------------------|--------|
| Source Type | APCI     | Ion Polarity   | Positive | Set Corrector Fill | 47 V   |
| Scan Range  | n/a      | Capillary Exit | 200.0 V  | Set Pulsar Pull    | 394 V  |
| Scan Begin  | 50 m/z   | Hexapole RF    | 300.0 V  | Set Pulsar Push    | 394 V  |
| Scan End    | 3000 m/z | Skimmer 1      | 50.0 V   | Set Reflector      | 1300 V |
|             |          | Hexapole 1     | 23.0 V   | Set Flight Tube    | 9000 V |
|             |          |                |          | Set Detector TOF   | 2300 V |

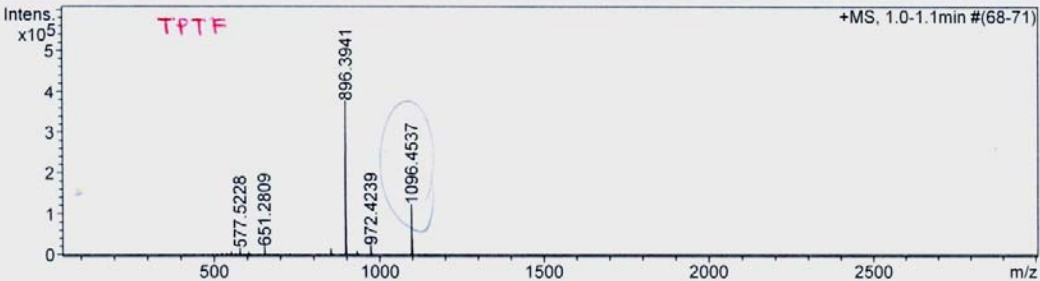

Supplement: c2jm15480c.pdf [file c2jm15480c.pdf]
